# Supplementary material for: Polymer-Functionalised Nanograins of Mg-Doped Amorphous Calcium Carbonate via a Flow-Chemistry Approach
Source: Materials (Basel). 2019 Jun 4;12(11):1818. doi: 10.3390/ma12111818 (PMC6601056; doi:10.3390/ma12111818)
Supplement: Supplementary file 1 [file materials-12-01818-s001.pdf]

## *Supplemental Information for*

# **Polymer-functionalized nanograins of Mg-doped amorphous calcium carbonate via a flow-chemistry approach**

**Benedikt Demmert<sup>1,4</sup>, Frank Schinzel<sup>1</sup>, Martina Schübler<sup>1</sup>, Mihail Mondeshki<sup>2</sup>, Joachim Kaschta<sup>3</sup>, Dirk W. Schubert<sup>3</sup>, Dorrit E. Jacob<sup>4</sup>, and Stephan E. Wolf<sup>1,5,\*</sup>**

1 Department of Materials Science and Engineering (WW), Institute of Glass and Ceramics (WW3), Friedrich-Alexander University Erlangen-Nuremberg (FAU), Martensstrasse 5, D-91058 Erlangen, Germany

2 Institute for Inorganic and Analytical Chemistry, Johannes Gutenberg-University, Duesbergweg 10-14, 55128 Mainz, Germany

3 Department of Materials Science and Engineering (WW), Institute of Polymer Materials (WW5), Friedrich-Alexander University Erlangen-Nuremberg (FAU), Martensstrasse 5, D-91058 Erlangen, Germany

4 Department of Earth and Planetary Sciences, Macquarie University, Sydney, 2109 NSW, Australia

5 Interdisciplinary Center for Functional Particle Systems (FPS), Friedrich-Alexander University Erlangen-Nuremberg, 91058 Erlangen, Germany

\* Correspondence: stephan.e.wolf@fau.de

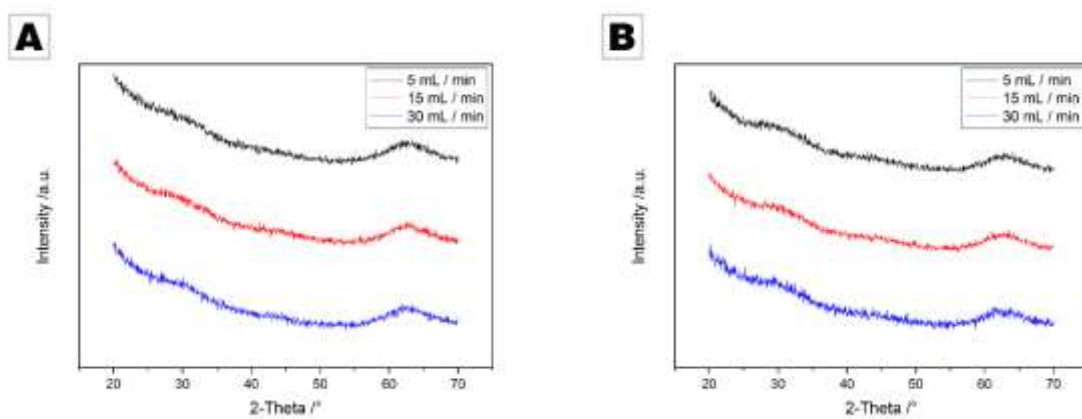

**Figure S1.** X-ray diffractograms of Mg-doped ACC generated in the flow-chemistry setup in the presence of PSS **(A)** and PAA **(B)**.

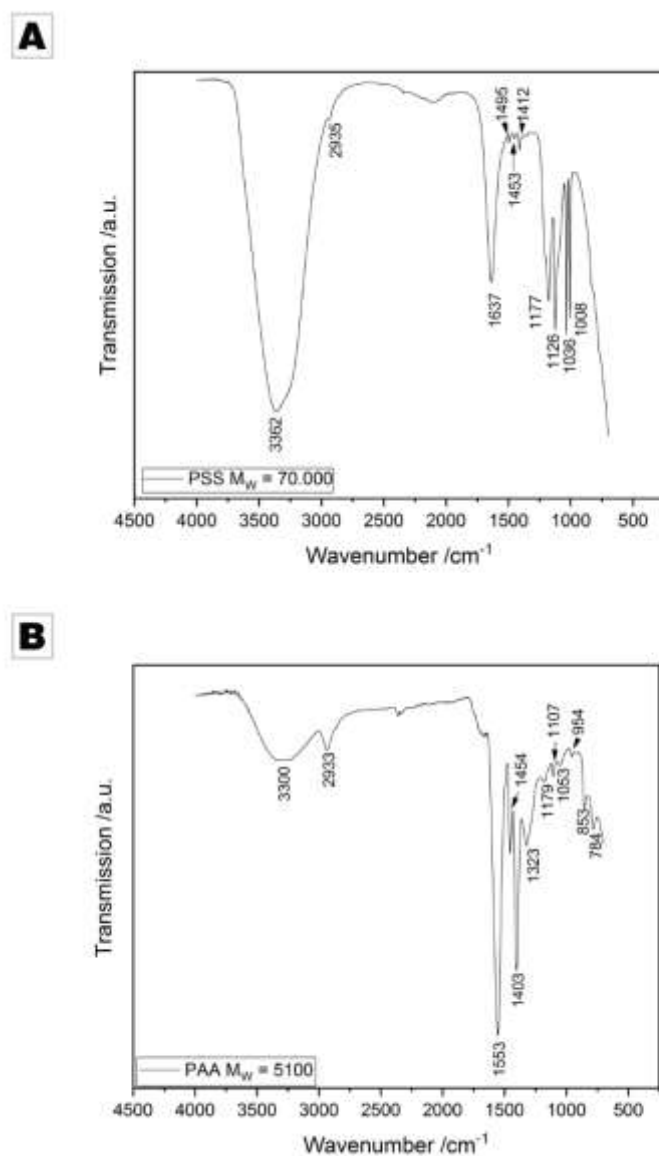

**Figure S2.** ATR-FTIR spectra of the pure polymers PSS **(A)** and PAA **(B)**.

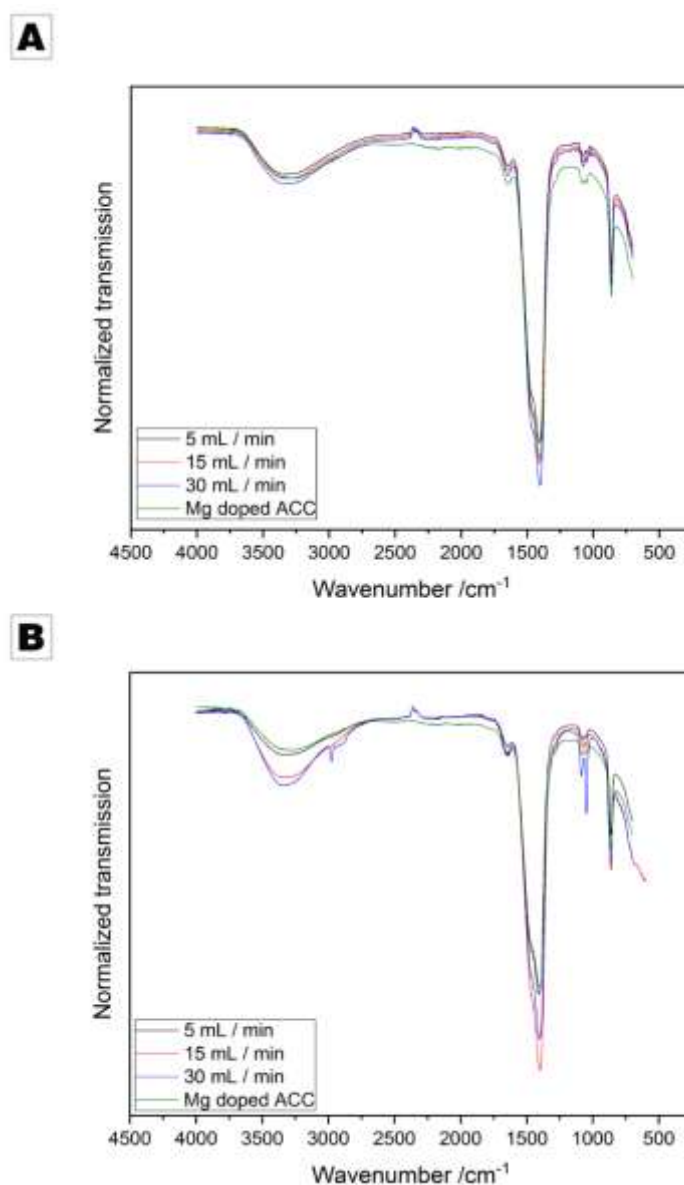

**Figure S3.** ATR-FTIR spectra of **(A)** PSS-functionalized and **(B)** PAA-functionalized Mg-doped ACC, prepared at varying flow rates. In the range from 3000 to 2700 cm<sup>-1</sup> only bands arising from solvents are detected, i.e., water or ethanol. In the case of PAA, the water bands at 1048 cm<sup>-1</sup> and 3400 cm<sup>-1</sup> increase with increasing flow rate.
